# Supplementary material for: Simultaneous visual detection and removal of lead(ii) ions with pyromellitic dianhydride-grafted cellulose nanofibrous membranes
Source: Royal Society of Chemistry journal article supplement (doi:10.1039/c5ta05030h), 2015-01-01
Supplement: c5ta05030h1.pdf [file c5ta05030h1.pdf]

**Simultaneous Visual Detection and Removal of Lead(II) Ions with Pyromellitic  
Dianhydride-Grafted Cellulose Nanofibrous Membranes**

*Yan Li,<sup>a</sup> Yanan Wen,<sup>a</sup> Lihuan Wang,<sup>a</sup> Jianxin He<sup>b</sup>, Salem S. Al-Deyab,<sup>c</sup> Mohamed El-  
Newehy,<sup>c, d</sup> Jianyong Yu<sup>e</sup> and Bin Ding,<sup>a, b\*</sup>*

*<sup>a</sup> Key Laboratory of Textile Science & Technology, Ministry of Education, College  
of Textiles, Donghua University, Shanghai 201620, China*

*<sup>b</sup> College of Textiles, Zhongyuan University of Technology, Zhengzhou 450007,  
China*

*<sup>c</sup> Petrochemical Research Chair, Department of Chemistry, College of Science,  
King Saud University, Riyadh 11451, Saudi Arabia*

*<sup>d</sup> Department of Chemistry, Faculty of Science, Tanta University, Tanta 31527,  
Egypt*

*<sup>e</sup> Nanomaterials Research Center, Modern Textile Institute, Donghua University,  
Shanghai 200051, China*

\* Corresponding author at: Key Laboratory of Textile Science & Technology, Ministry  
of Education, College of Textiles, Donghua University, Shanghai 201620, China.

Fax: +86 21 62378392.

*E-mail:* binding@dhu.edu.cn (B. Ding)

## Supplementary Figures

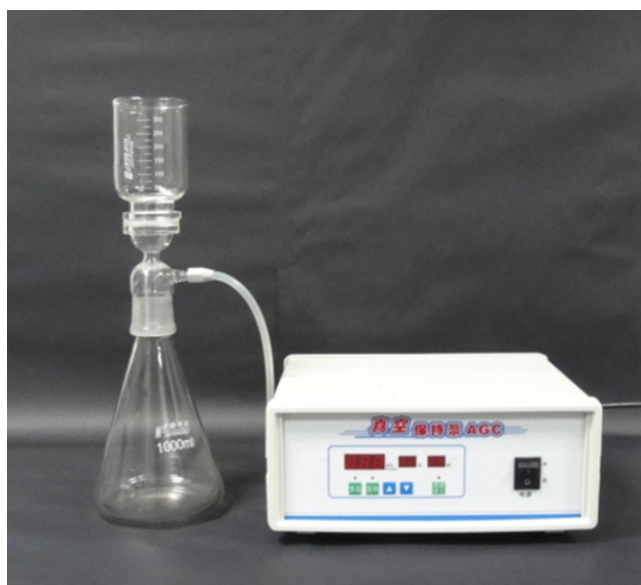

**Fig. S1.** Photograph shows the experimental detailed of the setup for colorimetric detection and enrichment of  $\text{Pb}^{2+}$ .

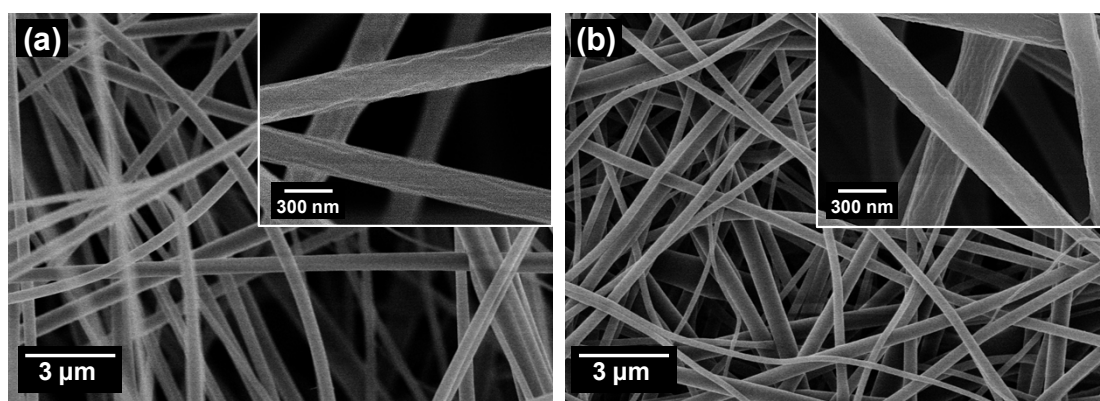

**Fig. S2.** FE-SEM images of (a) CA and (b) DCA NFM. Insets are the corresponding images at high magnification.

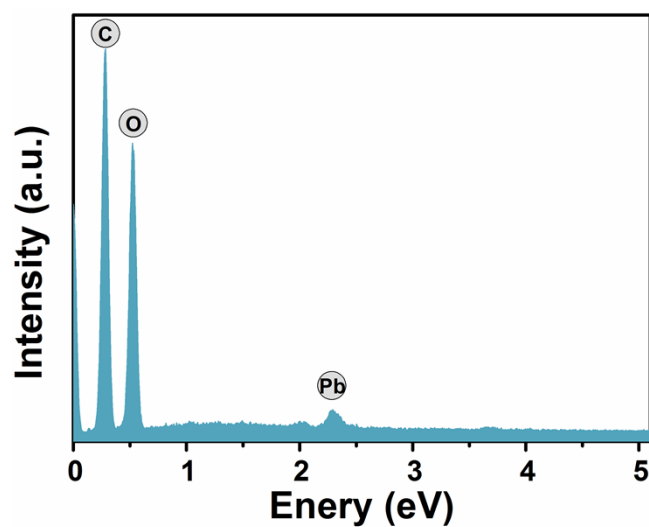

Fig. S3. EDX image of DCA<sub>1</sub>-PMDA<sub>3</sub> after incubation with Pb<sup>2+</sup>.

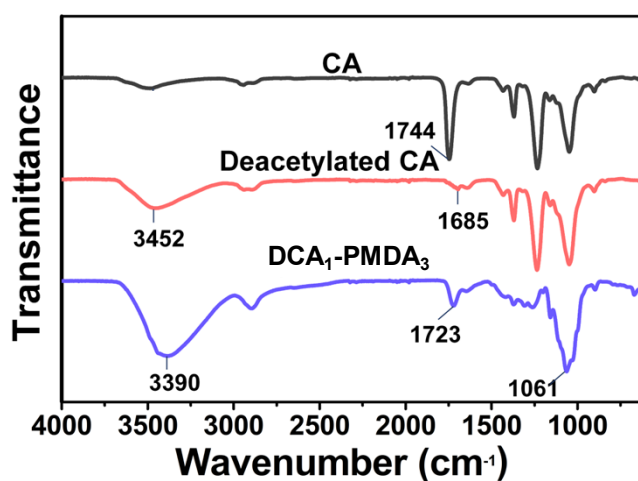

Fig. S4. FT-IR spectra of CA, DCA and DCA<sub>1</sub>-PMDA<sub>3</sub> NFM.

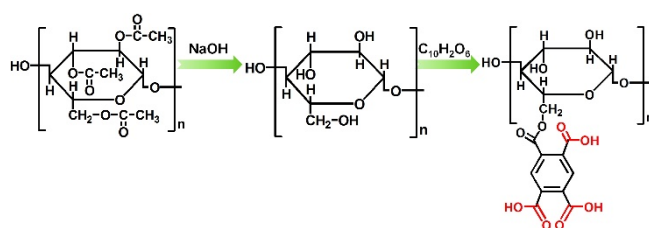

Fig. S5. Reaction scheme for the modification of CA to DCA-PMDA.

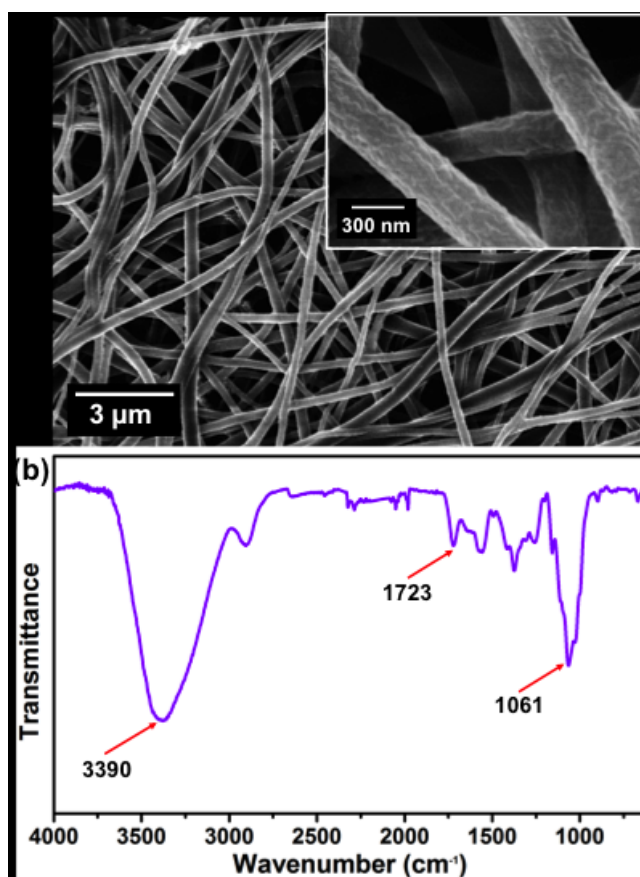

**Fig. S6.** FE-SEM image (a) and FT-IR spectrum (b) of strip after treated with 3 M HNO<sub>3</sub> for 10 times. Inset is the corresponding image at high magnification.

### Supplementary Tables

**Table S1.** Comparison of naked eye detect limit of different NFM based sensor strips for Pb<sup>2+</sup>.

| Colorimetric Pb <sup>2+</sup> sensing materials | Naked eye detect limit | Ref.       |
|-------------------------------------------------|------------------------|------------|
| Gold probe loaded PA6/NC                        | 0.2 μM                 | 1          |
| Gold probe loaded PA6/PVdF                      | 0.48 μM                | 2          |
| PDA-5EG/PAN                                     | 0.48 μM                | 3          |
| PDA-Gly/PAN/SiO <sub>2</sub>                    | 0.2 μM                 | 4          |
| DCA-PMDA                                        | 0.048 μM               | This study |

**Table S2.** Determination and removal of Pb<sup>2+</sup> levels in real water samples.

| Samples    | Pb <sup>2+</sup> ( $\mu\text{M}$ ) |                 | %Recovery | Pb <sup>2+</sup> concentration after filtration ( $\mu\text{M}$ ) |
|------------|------------------------------------|-----------------|-----------|-------------------------------------------------------------------|
|            | Added                              | Found           |           |                                                                   |
| Lake water | 1                                  | 1.04 $\pm$ 0.24 | 104       | <4.8 $\times$ 10 <sup>-4</sup>                                    |
|            | 2                                  | 1.98 $\pm$ 0.27 | 99        | <4.8 $\times$ 10 <sup>-4</sup>                                    |
|            | 4                                  | 3.71 $\pm$ 0.34 | 93        | <4.8 $\times$ 10 <sup>-4</sup>                                    |
| Tap water  | 1                                  | 0.91 $\pm$ 0.45 | 91        | <4.8 $\times$ 10 <sup>-4</sup>                                    |
|            | 2                                  | 1.87 $\pm$ 0.29 | 94        | <4.8 $\times$ 10 <sup>-4</sup>                                    |
|            | 4                                  | 4.35 $\pm$ 0.36 | 109       | <4.8 $\times$ 10 <sup>-4</sup>                                    |

**Table S3.** The rejection of DCA-PMDA towards different concentration of Pb<sup>2+</sup> in the feed solution.

| C <sub>0</sub> ( $\mu\text{M}$ ) | Rejection (%) |
|----------------------------------|---------------|
| 10                               | 92.74         |
| 20                               | 96.82         |
| 50                               | 82.59         |
| 100                              | 53.71         |
| 200                              | 30.93         |

**Table S3.** Isotherm parameters for the adsorption of Pb<sup>2+</sup> onto the DCA-PMDA.

| Isotherms  | Isotherm constants | value                 |
|------------|--------------------|-----------------------|
|            | $q_m$ (mg/g)       | 326.8                 |
| Langmuir   | $K_L$              | 2.76                  |
|            | $R^2$              | 0.9964                |
|            | 1/n                | 0.2941                |
| Freundlich | $K_F$              | 138.23                |
|            | $R^2$              | 0.7153                |
|            | $q_{DR}$           | 307.58                |
| DKR        | $\beta$            | $0.75 \times 10^{-7}$ |
|            | $R^2$              | 0.74772               |

### Supplementary References

1. Y. Li, Y. Si, X. Wang, B. Ding, G. Sun, G. Zheng, W. Luo and J. Yu, *Biosens. Bioelectron.*, 2013, **48**, 244.
2. Y. Li, B. Ding, G. Sun, T. Ke, J. Chen, S. S. Al-Deyab and J. Yu, *Sensor. Actuat. B-Chem.*, 2014, **204**, 673.
3. Y. Li, L. Wang, X. Yin, B. Ding, G. Sun, T. Ke, J. Chen and J. Yu, *J. Mater. Chem. A*, 2014, **2**, 18304.
4. Y. Li, L. Wang, Y. Wen, B. Ding, G. Sun, T. Ke, J. Chen and J. Yu, *J. Mater. Chem. A*, 2015, **3**, 9722.
